# Supplementary material for: Surgery for synchronous and metachronous single-organ metastasis of pancreatic cancer: a SEER database analysis and systematic literature review
Source: PubMed Central journal article supplement (PMC7064579; doi:10.1038/s41598-020-61487-0), 2020-03-10
Supplement: 41598_2020_61487_MOESM1_ESM.pdf [file 41598_2020_61487_MOESM1_ESM.pdf]

## Supplementary material

### **Surgery for synchronous and metachronous single-organ metastasis of pancreatic cancer: a SEER database analysis and systematic literature review**

Qiaofei Liu<sup>1</sup>, Ronghua Zhang<sup>1</sup>, Christoph W. Michalski<sup>2</sup>, Bing Liu<sup>3</sup>, Quan Liao<sup>1</sup>, Jorg Kleeff<sup>2</sup>

1. Department of General Surgery, Peking Union Medical College Hospital, Peking Union Medical College & Chinese Academy of Medical Sciences, Beijing 100730, China

2. Department of Visceral, Vascular and Endocrine Surgery, Martin-Luther-University Halle-Wittenberg, 06120 Halle (Saale), Germany

3. Department of Surgery, Heidelberg University Hospital, Im Neuenheimer Feld 110, 69120 Heidelberg, Germany

#### Address for correspondence:

Jorg Kleeff, MD, FACS, FRCS, Department of Visceral, Vascular and Endocrine Surgery, University Hospital Halle (Saale), Martin-Luther-University Halle-Wittenberg

Ernst-Grube-Str. 40, 06120 Halle (Saale), Germany

phone: +49-345-557-2314, fax: +49-345-557-2551

email: joerg.kleeff@uk-halle.de

Quan Liao, MD, Department of General Surgery, Peking Union Medical College Hospital, Peking Union Medical College & Chinese Academy of Medical Sciences,

1# Shuai Fu Yuan, Dong Chen District, 100730 Beijing, China

phone: +86-10-6915-6007

email: lqpumc@126.com

**Suppl. figures and tables**

Figure S1: Survival curves for the whole cohort of 11541 PDAC patients with distant metastasis (A), depending on different locations of the tumor (B,  $p < 0.05$ ), depending on different age groups (C,  $p < 0.001$ ), depending on the number of involved organs (D,  $p < 0.001$ ), and depending on different grades of differentiation (E,  $p < 0.001$ ).

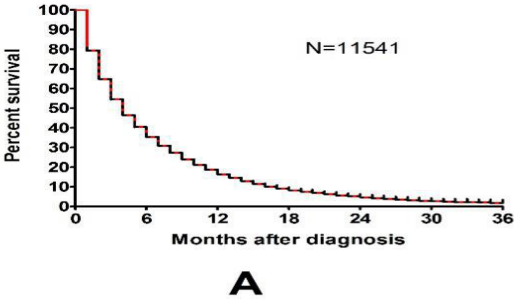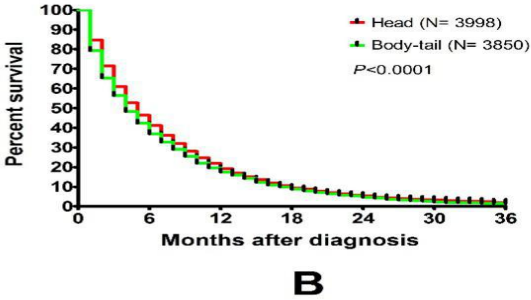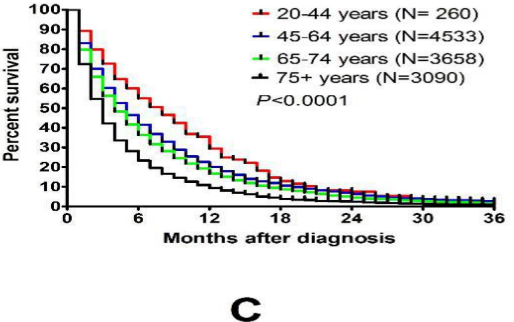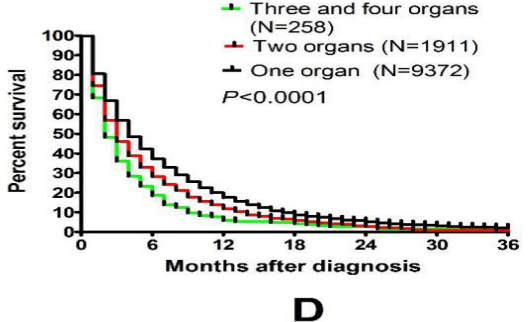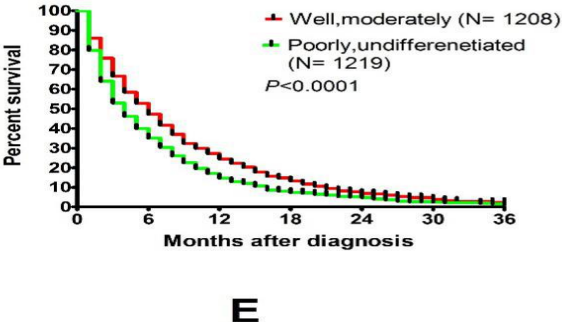

Figure S2: Survival curves for the whole cohort of 11541 PDAC patients with distant metastasis, depending on T stage (A,  $p>0.05$ ), depending on gender (B,  $p>0.05$ ).

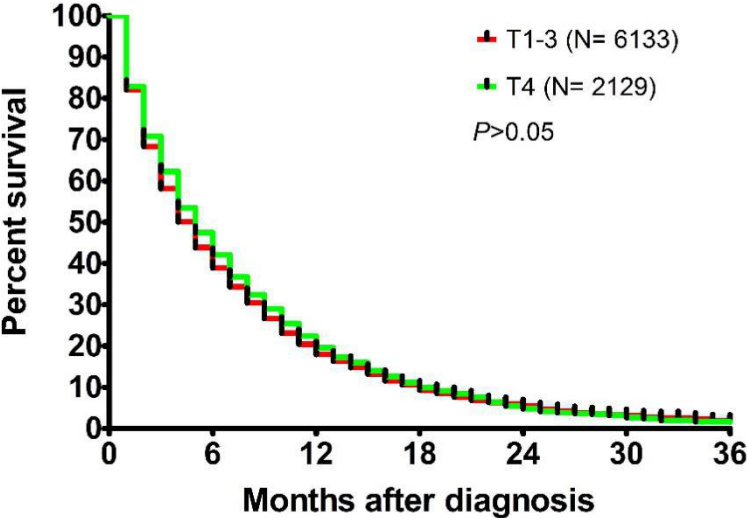

A

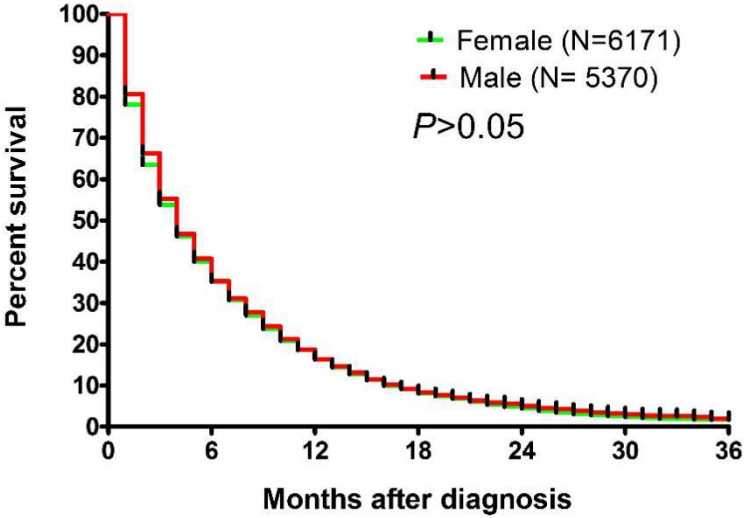

B

Figure S3: Survival curves for the whole cohort of 7156 PDAC patients with single organ distant metastasis, depending on gender (A,  $p>0.05$ ), depending on T stage (B,  $p>0.05$ ).

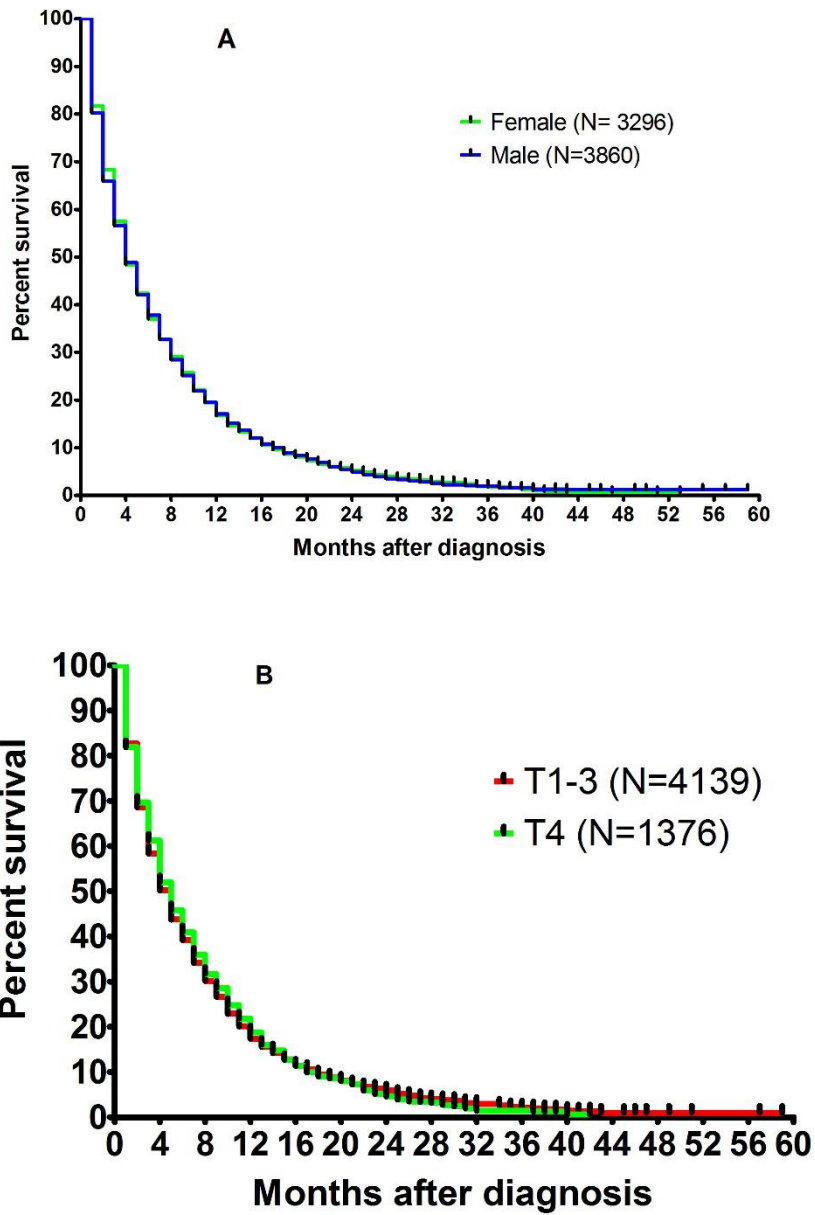

Figure S4: Survival curves of single organ liver metastasis undergoing primary tumor resection with or without resection of metastasis (A,  $p>0.05$ ) and single organ lung metastasis undergoing primary tumor resection with or without resection of metastasis (B,  $p>0.05$ )

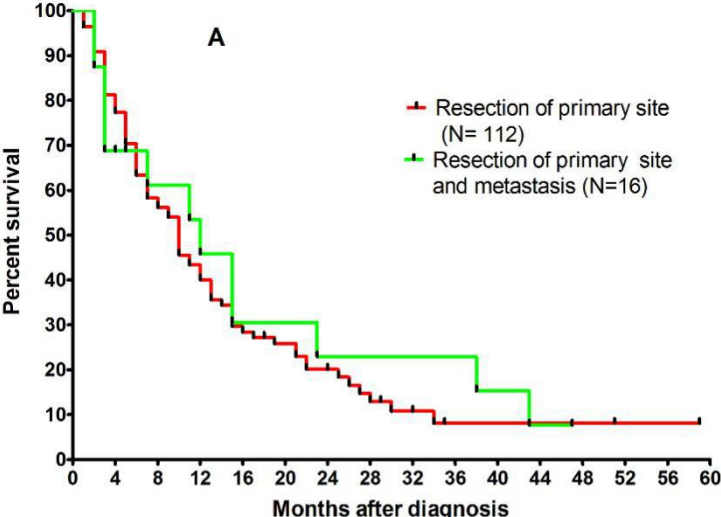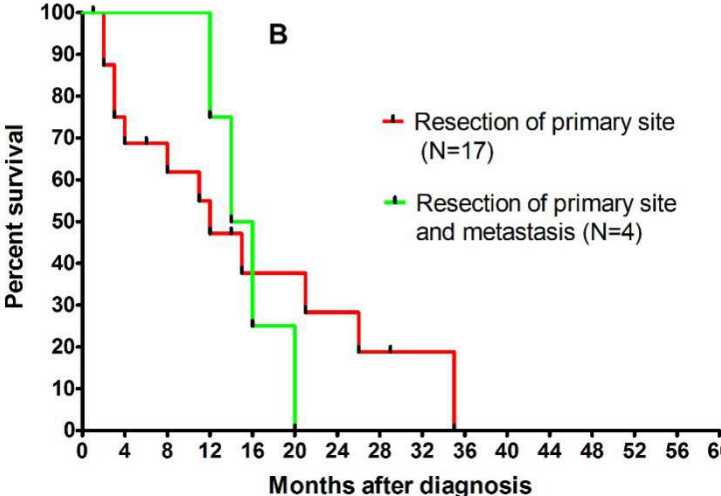

Figure S5: PRISMA flowchart of the literature review

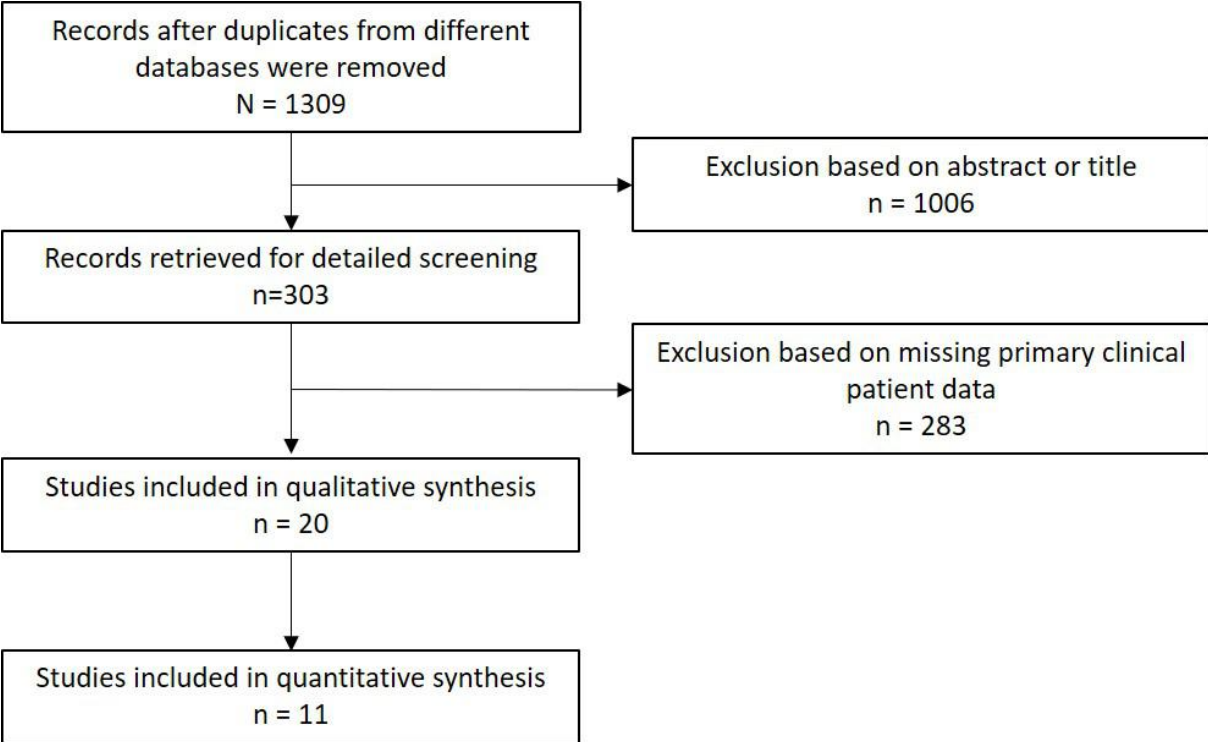

Figure S6: Survival curves of PDAC patients with metachronous single organ lung metastasis depending on age (survival from initial resection A, from resection of metastasis B), gender (survival from initial resection C, from resection of metastasis D).

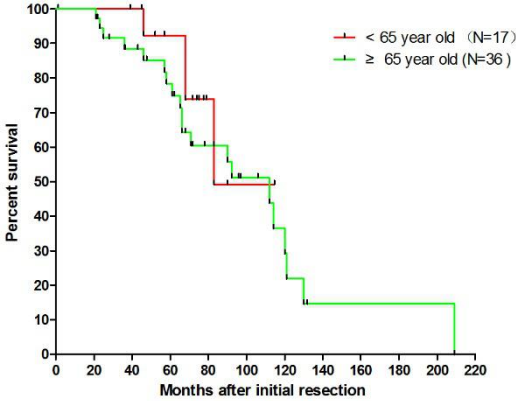

**A**

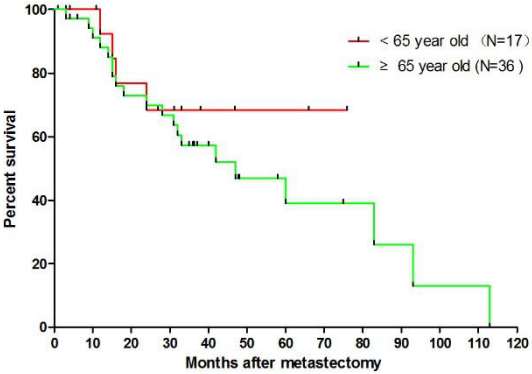

**B**

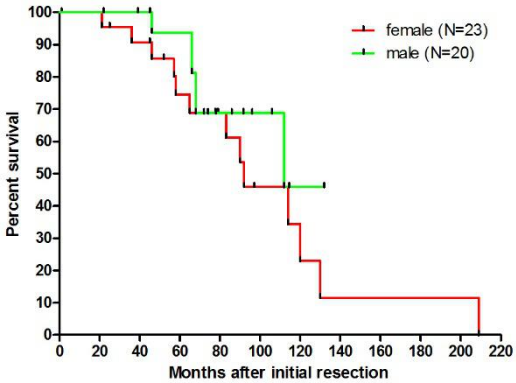

**C**

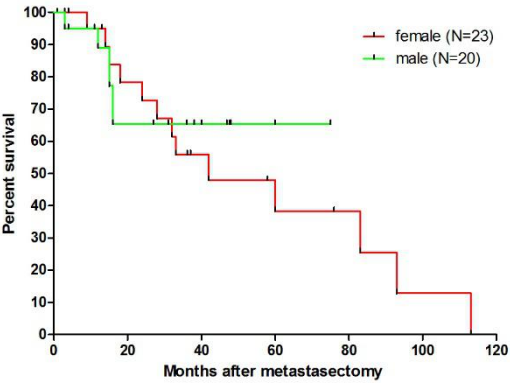

**D**

Table S1: Univariate and multivariate analysis of factors influencing DSS in 11,541 PDAC patients with distant metastasis.

| Variable         | N           | 1- year survival rate | 2- year survival rate | 3- year survival rate | Median survival $\pm$ SE(m) | Univariate analysis |                | Multivariate analysis |                       |                |                  |               |         |
|------------------|-------------|-----------------------|-----------------------|-----------------------|-----------------------------|---------------------|----------------|-----------------------|-----------------------|----------------|------------------|---------------|---------|
|                  |             |                       |                       |                       |                             | 95% CI              | <i>p</i> value | HR                    | 95% CI                | <i>p</i> value |                  |               |         |
| Whole cohort     | 11541       | 13.89%                | 2.62%                 | 0.62%                 | 4.0 $\pm$ 0.07              | 3.87-4.14           |                |                       |                       |                |                  |               |         |
| Gender           | female      | 6171                  | 11.76%                | 2.79%                 | 0.42%                       | 4.0 $\pm$ 0.10      | 3.381-4.19     | >0.05                 |                       |                |                  |               |         |
|                  | male        | 5370                  | 11.75%                | 3.11%                 | 0.59%                       | 4.0 $\pm$ 0.97      | 3.81-4.19      |                       |                       |                |                  |               |         |
| Age              | 20-44 years | 260                   | 27.30%                | 4.61%                 | NA                          | 8.0 $\pm$ 0.73      | 6.57-9.44      | <0.0001               | 1:1.22                |                |                  |               |         |
|                  | 45-64 years | 4533                  | 16.74%                | 3.42%                 | 0.70%                       | 5.0 $\pm$ 0.12      | 4.76-5.24      |                       |                       | (20-64 years/  | 65+(20-64 years/ | 65+ 1.19-1.25 | <0.0001 |
|                  | 65-74 years | 3658                  | 14.02%                | 2.57%                 | 0.49%                       | 4.0 $\pm$ 0.12      | 3.77-4.23      |                       |                       |                |                  |               |         |
|                  | 75+ years   | 3090                  | 8.31%                 | 1.33%                 | 0.16%                       | 3.0 $\pm$ 0.06      | 2.89-4.11      |                       |                       |                |                  |               |         |
| Localization     | head        | 3998                  | 16.83%                | 3.15%                 | 0.65%                       | 5.0 $\pm$ 0.12      | 4.76-5.24      | <0.0001               | 1:1.11                |                |                  |               |         |
|                  | body/tail   | 3851                  | 14.62%                | 2.68%                 | 0.36%                       | 4.0 $\pm$ 0.12      | 3.78-4.23      | (head/ body and tail) | (head/ body and tail) | 1.00-1.26      | 0.04             |               |         |
|                  | unknown     | 3692                  | NA                    | NA                    | NA                          | NA                  |                |                       |                       |                |                  |               |         |
| Differentiation  | G1, G2      | 1208                  | 21.27%                | 4.30%                 | 0.66%                       | 6.0 $\pm$ 0.27      | 5.48-6.52      | <0.0001               | 1:1.35                |                |                  |               |         |
|                  | G3, G4      | 1219                  | 13.29%                | 3.20%                 | 0.57%                       | 4.0 $\pm$ 0.18      | 3.65-4.36      | (G1-2/G3-4)           | (G1-2/G3-4)           | 1.22-1.49      | <0.0001          |               |         |
|                  | unknown     | 10114                 | NA                    | NA                    | NA                          | NA                  |                |                       |                       |                |                  |               |         |
| T classification | T4          | 2129                  | 19.58%                | 4.87%                 | NA                          | 5.0 $\pm$ 0.91      | 4.82-5.18      | >0.05                 |                       |                |                  |               |         |



|                           |                   |      |        |       |       |           |           |                              |                                                |
|---------------------------|-------------------|------|--------|-------|-------|-----------|-----------|------------------------------|------------------------------------------------|
|                           | T1-T3             | 6133 | 18.00% | 5.49% | 1.83% | 5.0±0.17  | 4.68-5.32 |                              |                                                |
|                           | unknown           | 3279 | NA     | NA    | NA    | NA        |           |                              |                                                |
| Number of involved organs | one organ         | 9372 | 14.94% | 2.91% | 0.68% | 4.0± 0.07 | 3.86-4.14 |                              |                                                |
|                           | two organs        | 1911 | 9.79%  | 1.26% | 0.21% | 3.0±0.13  | 2.75-3.25 | <0.0001                      | 1:1.33                                         |
|                           | three/four organs | 258  | 6.20%  | 1.16% | NA    | 2.0±0.19  | 1.62-2.38 | (one organ/ multiple organs) | (one organ/ multiple organs) 1.21-1.45 <0.0001 |

NA: not available

Table S2: Systematic literature review of single-organ lung metastasis of PDAC

| Reference                        | Country | Year | n  | Age<br>Median (range)     | Gender<br>(m/f)      | Interval (m)<br>Median (range) | Status | Survival 1<br>Median (range) | Survival 2<br>Median (range)    | Type |
|----------------------------------|---------|------|----|---------------------------|----------------------|--------------------------------|--------|------------------------------|---------------------------------|------|
| Kruger et al. <sup>1</sup>       | Germany | 2016 | 13 | NA                        | NA                   | 0                              |        | 22.8(17.3-28.3)              |                                 | i    |
| Kruger et al. <sup>1</sup>       | Germany | 2016 | 5  | NA                        | NA                   | 5.0(3.4-8.0)                   |        | NA                           | 10.7(0-24.9)                    | ii   |
| Arnaoutakis et al. <sup>2</sup>  | USA     | 2011 | 22 | 67.4 (11.2)<br>(mean, SD) | 11/11                | 14 (8–20)                      |        | 23 (18–52)                   | 7.5 (3.4–22.0)                  | ii   |
| Yamashita et al. <sup>3</sup>    | Japan   | 2015 | 13 | NA                        | NA                   | 15.3(.1-72)                    |        | 37.5 (3.2-73.4)              | 17.1(0.4-37.5)                  | iii  |
| Downs-Canner et al. <sup>4</sup> | USA     | 2015 | 23 | NA                        | NA                   | NA                             |        | 33.8 (NA)                    | NA                              | iii  |
| Wangjam et al. <sup>5</sup>      | USA     | 2015 | 28 | 65.2 (47-80)              | 9/15<br>(4, unknown) | 12.7 (9.9-30.8)                |        | 27.8 (18.2-50.0)             | 8.5(5.7-19.5)                   | iii  |
| Kruger et al. <sup>1</sup>       | Germany | 2016 | 22 | NA                        | NA                   | 10.5 (1.7-65.7)                |        | NA                           | 31.3 (23.8-33.8)                | iii  |
| Zheng et al. <sup>6</sup>        | Japan   | 2017 | 24 | 9/15<br>(<65, >65)        | 16/8                 | 15(NA)                         |        | 36(NA)                       | 20 (NA)                         | iii  |
| Lovecek et al. <sup>7</sup>      | Japan   | 2017 | 3  | NA                        | 0/3                  | 22 (11.5-32)                   |        | 50.5 (24-82.5)               | 18.5 (12.5-60.5)                | iii  |
| Groot, et al. <sup>18</sup>      | USA     | 2018 | 32 | 70 (63 - 79)              | NA                   | NA                             |        | 24.5 (20.6 - 28.5)           | 8.1 (4.4 - 11.7)<br>(supportive | iii  |

|                                  |        |      |    |                          |       |               |             |                       | treatment)                              |     |
|----------------------------------|--------|------|----|--------------------------|-------|---------------|-------------|-----------------------|-----------------------------------------|-----|
| Groot, et al. <sup>18</sup>      | USA    | 2018 | 45 | 69 (63 - 77)             | NA    | NA            |             | 34.2 (23.4 - 45.1)    | 20.2 (17.2 - 23.2)<br>(chemo/radiation) | iii |
| Thomas et al. <sup>8</sup>       | USA    | 2012 | 7  | NA                       | NA    | 52 (14-86)    |             | 63.7 (18-100.3) (DFI) | 19 (0.7-48) (DFI)                       | iv  |
| Miyasaka et al. <sup>9</sup>     | Japan  | 2018 | 1  | 70                       | male  | 56;58;74      | alive       | 96                    | 40                                      | iv  |
| Yasukawa et al. <sup>10</sup>    | Japan  | 2017 | 12 | 74.25 (63-83)            | 6/6   | NA            |             | 66.5 (23-121)         | 32 (6-66)                               | iv  |
| Lovecek et al. <sup>7</sup>      | Japan  | 2017 | 2  | NA                       | 0/2   | 34/52         | alive/alive | 45/65                 | 11/13                                   | iv  |
| Decoster et al. <sup>11</sup>    | France | 2016 | 37 | 70(54-86)                | 10/27 |               |             | 31.9 (NA)             | 20.8 (NA)                               | iv  |
| Nakajima et al. <sup>12</sup>    | Japan  | 2016 | 17 | 75 (52-81)               | 6/9   | 44 (8-96)     |             | 92 (21-209)           | 37 (9-93)                               | iv  |
| Robinson et al. <sup>13</sup>    | USA    | 2015 | 15 | 62 (44-83)               | 6/9   | 24 (3-68)     |             | 52 (21-83)            | 16 (1-76)                               | iv  |
| Brieau et al. <sup>14</sup>      | France | 2015 | 2  | 70/69                    | 2/0   | 26/60         | alive/alive | 68/132                | 36/60                                   | iv  |
| Yamashita et al. <sup>3</sup>    | Japan  | 2015 | 2  | NA                       | NA    | 21/36         | alive/alive | 65/75                 | 44/39                                   | iv  |
| Downs-Canner et al. <sup>4</sup> | USA    | 2015 | 8  | NA                       | NA    | NA            |             | 67.5(NA)              | NA                                      | iv  |
| Nakada et al. <sup>15</sup>      | Japan  | 2014 | 1  | 68                       | m     | 16            | alive       | 22                    | 4                                       | iv  |
| Kitasato et al. <sup>16</sup>    | Japan  | 2012 | 4  | 61 (59-72)               | 2/2   | 52.5 (25-132) |             | 69.5 (64-167)         | 21 (4-41)                               | iv  |
| Arnaoutakis et al. <sup>2</sup>  | USA    | 2011 | 9  | 69.4 (5.5)<br>(mean, SD) | 3/6   | 29 (18-47)    |             | 51 (39-53)            | 18.6 (5.6-29.2)                         | iv  |

|                               |         |      |    |              |     |                 |       |                    |                    |    |
|-------------------------------|---------|------|----|--------------|-----|-----------------|-------|--------------------|--------------------|----|
| Moon et al. <sup>17</sup>     | USA     | 2011 | 1  | 56           | m   | 24              | alive | 39                 | 11                 | iv |
| Groot, et al. <sup>18</sup>   | USA     | 2019 | 19 | 65 (60 - 74) | NA  | 24.3(9.6-83.0)  |       | 68.9 (45.5 - 92.3) | 35.0 (21.1 - 48.9) | iv |
| Okui, et al. <sup>19</sup>    | Japan   | 2017 | 6  | 64(53-74)    | 3/3 | 26.0(19.7-64.0) |       | 85.9(65.4-114.6)   | 38.3(31.1-47.7)    | iv |
| Ilmer M, et al. <sup>20</sup> | Germany | 2019 | 11 | 66 (49 - 75) | 6/5 | 17              |       | 37.7               | 26                 | iv |

---

i: synchronous metastasis: no surgical treatment

ii: metachronous metastasis: no surgery for primary tumor and metastasis

iii: metachronous metastasis: resection of the primary tumor, no surgery for metastasis

iv: metachronous metastasis: resection of the primary tumor and metastasis

survival 1: survival after the initial diagnosis/ surgery

survival 2: survival after the diagnosis of lung metastasis/ resection of metastasis

NA: not available

Table S3: Extracted information of 79 patients from the reported studies.

| Age | Gender | Differentiation(G1/G2/G3/G4/unknown) | Stage (I/II/III/IV/<br>unknown) | Number of lesions | Interval | Status | Survival 1 | Survival 2 |
|-----|--------|--------------------------------------|---------------------------------|-------------------|----------|--------|------------|------------|
| 70  | m      | 0/1/0/0/0                            | 1/0/0/0/0                       | 3                 | 56       | alive  | 96         | 40         |
| 83  | NA     | 0/0/0/0/1                            | 0/1//0/0/0                      | 1                 | 15       | dead   | 25         | 10         |
| 78  | NA     | 0/0/0/0/1                            | 0/0/1/0/0                       | 3                 | 8        | alive  | 43         | 35         |
| 64  | NA     | 0/0/0/0/1                            | 0/1//0/0/0                      | 1                 | 42       | alive  | 75         | 33         |
| 78  | NA     | 0/0/0/0/1                            | 0/1//0/0/0                      | 1                 | 50       | alive  | 83         | 33         |
| 72  | NA     | 0/0/0/0/1                            | 0/1//0/0/0                      | 2                 | 39       | alive  | 72         | 33         |
| 75  | NA     | 0/0/0/0/1                            | 0/0/0/1/0                       | 1                 | 49       | dead   | 71         | 24         |
| 77  | NA     | 0/0/0/0/1                            | 0/0/1/0/0                       | 2                 | 11       | dead   | 23         | 12         |
| 77  | NA     | 0/0/0/0/1                            | 0/1/0/0/0                       | 1                 | 74       | dead   | 121        | 47         |
| 63  | NA     | 0/0/0/0/1                            | 0/1/0/0/0                       | 1                 | 24       | alive  | 90         | 66         |
| 70  | NA     | 0/0/0/0/1                            | 0/0/1/0/0                       | 3                 | 30       | dead   | 61         | 31         |
| 80  | NA     | 0/0/0/0/1                            | 0/0/1/0/0                       | 1                 | 34       | alive  | 62         | 28         |
| 74  | NA     | 0/0/0/0/1                            | 1/0/0/0/0                       | 1                 | 22       | alive  | 28         | 6          |
| NA  | f      | 0/0/0/0/1                            | 0/1/0/0/0                       | 1                 | 34       | alive  | 45         | 11         |
| NA  | f      | 0/0/0/0/1                            | 0/1/0/0/0                       | 1                 | 52       | alive  | 65         | 13         |

|    |   |            |           |    |    |       |     |     |
|----|---|------------|-----------|----|----|-------|-----|-----|
| 66 | f | 0/0/0/0/1  | 0/0/1/0/0 | 4  | 96 | dead  | 209 | 113 |
| 76 | f | 0/0/0/0/1  | 0/0/1/0/0 | 1  | 61 | dead  | 120 | 60  |
| 79 | f | 0/0/0/0/1  | 1/0/0/0/0 | 1  | 8  | dead  | 21  | 9   |
| 75 | m | 0/0/0/0/1  | 0/1/0/0/0 | 1  | 53 | dead  | 66  | 15  |
| 81 | m | 0/0/0/0/1  | 0/0/1/0/0 | 1  | 51 | dead  | 66  | 15  |
| 79 | f | 0/0/0/0/1  | 0/0/1/0/0 | 1  | 72 | dead  | 90  | 18  |
| 69 | f | 0/0/0/0/1  | 0/1/0/0/0 | 2  | 26 | dead  | 58  | 32  |
| 77 | f | 0/0/0/0/1  | 0/0/1/0/0 | 8  | 78 | dead  | 92  | 14  |
| 68 | f | 0/0/0/0/1  | 0/1/0/0/0 | 1  | 37 | dead  | 130 | 93  |
| 78 | f | 0/0/0/0/1  | 0/1/0/0/0 | 2  | 31 | dead  | 114 | 83  |
| 68 | m | 0/0/0/0/1  | 0/1/0/0/0 | 1  | 96 | dead  | 112 | 16  |
| 52 | m | 0/0/0/0/1  | 0/1/0/0/0 | 2  | 54 | dead  | 68  | 12  |
| 79 | f | 0/0/0/0/1  | 0/0/1/0/0 | 3  | 20 | dead  | 65  | 42  |
| 78 | f | 0/0/0/0/1  | 1/0/0/0/0 | 1  | 39 | alive | 97  | 58  |
| 66 | m | 0/0/0/0/1  | 1/0/0/0/0 | 1  | 31 | alive | 106 | 75  |
| 71 | f | 0/0/0/0/1  | 1/0/0/0/0 | 1  | 60 | alive | 97  | 37  |
| 60 | m | 0/0/0/0/1  | 0/1/0/0/0 | 1  | 36 | alive | 74  | 38  |
| 76 | m | 0/0/0//0/1 | 0/1/0/0/0 | NA | 30 | alive | 78  | 48  |
| 58 | f | 0/0/0/0/1  | 0/1/0/0/0 | NA | 22 | dead  | 46  | 24  |

|    |    |           |           |    |    |       |      |     |
|----|----|-----------|-----------|----|----|-------|------|-----|
| 44 | f  | 0/0/0/0/1 | 0/1/0/0/0 | NA | 24 | alive | 57   | 33  |
| 59 | m  | 0/0/0/0/1 | 0/1/0/0/0 | NA | 18 | alive | 45   | 27  |
| 56 | m  | 0/0/0/0/1 | 0/1/0/0/0 | NA | 29 | alive | 45   | 16  |
| 65 | f  | 0/0/0/0/1 | 0/1/0/0/0 | NA | 24 | dead  | 57   | 33  |
| 56 | f  | 0/0/0/0/1 | 0/0/0/0/1 | NA | 68 | dead  | 83   | 15  |
| 73 | f  | 0/0/0/0/1 | 0/1/0/0/0 | NA | 8  | dead  | 36   | 28  |
| 62 | m  | 0/0/0/0/1 | 0/1/0/0/0 | NA | 52 | dead  | 68   | 16  |
| 62 | f  | 0/0/0/0/1 | 0/1/0/0/0 | NA | 3  | alive | 79   | 76  |
| 76 | m  | 0/0/0/0/1 | 1/0/0/0/0 | NA | 43 | dead  | 46   | 3   |
| 42 | m  | 0/0/0/0/1 | 1/0/0/0/0 | NA | 68 | alive | 72   | 4   |
| 83 | f  | 0/0/0/0/1 | 0/1/0/0/0 | NA | 22 | alive | 25   | 4   |
| 64 | f  | 0/0/0/0/1 | 0/1/0/0/0 | NA | 48 | alive | 52   | 3   |
| 61 | f  | 0/0/0/0/1 | 0/1/0/0/0 | NA | 20 | alive | 1    | 1   |
| 70 | m  | 1/0/0/0/0 | 0/1/0/0/0 | 1  | 26 | alive | 68   | 36  |
| 69 | m  | 1/0/0/0/0 | 0/1/0/0/0 | 1  | 60 | alive | 132  | 60  |
| NA | NA | 0/0/0/0/1 | 0/0/0/0/1 | 1  | 21 | alive | 65   | 44  |
| NA | NA | 0/0/0/0/1 | 0/0/0/0/1 | 1  | 36 | alive | 75   | 39  |
| 68 | m  | 1/0/0/0/0 | 0/1/0/0/0 | 1  | 16 | alive | 22   | 4   |
| NA | NA | 0/0/0/0/1 | 0/0/0/0/1 | NA | 63 | alive | 63.7 | 0.7 |

|    |    |           |           |    |      |       |       |      |
|----|----|-----------|-----------|----|------|-------|-------|------|
| NA | NA | 0/0/0/0/1 | 0/0/0/0/1 | NA | 36   | alive | 55    | 19   |
| NA | NA | 0/0/0/0/1 | 0/0/0/0/1 | NA | 52   | alive | 100   | 48   |
| NA | NA | 0/0/0/0/1 | 0/0/0/0/1 | NA | 14   | alive | 18    | 4    |
| NA | NA | 0/0/0/0/1 | 0/0/0/0/1 | NA | 86   | alive | 103   | 17   |
| NA | NA | 0/0/0/0/1 | 0/0/0/0/1 | NA | 55   | alive | 84    | 29   |
| NA | NA | 0/0/0/0/1 | 0/0/0/0/1 | NA | 22   | alive | 52    | 30   |
| 56 | M  | 0/0/0/0/1 | 0/1/0/0/0 | 1  | 24   | alive | 39    | 11   |
| NA | NA | 0/0/0/0/1 | 0/0/0/0/1 | NA | 63   | alive | 63.7  | 0.7  |
| NA | NA | 0/0/0/0/1 | 0/0/0/0/1 | NA | 36   | alive | 55    | 19   |
| NA | NA | 0/0/0/0/1 | 0/0/0/0/1 | NA | 52   | alive | 100   | 48   |
| NA | NA | 0/0/0/0/1 | 0/0/0/0/1 | NA | 14   | alive | 18    | 4    |
| NA | NA | 0/0/0/0/1 | 0/0/0/0/1 | NA | 86   | alive | 103   | 17   |
| NA | NA | 0/0/0/0/1 | 0/0/0/0/1 | NA | 55   | alive | 84    | 29   |
| NA | NA | 0/0/0/0/1 | 0/0/0/0/1 | NA | 22   | alive | 52    | 30   |
| NA | NA | 0/0/0/0/1 | 0/0/0/0/1 | 1  | 13.3 | dead  | 39.6  | 17.7 |
| NA | NA | 0/0/0/0/1 | 0/0/0/0/1 | 1  | 48.9 | dead  | 134.1 | 83.9 |
| NA | NA | 0/0/0/0/1 | 0/0/0/0/1 | 1  | 40.3 | alive | 103.0 | 38.4 |
| NA | NA | 0/0/0/0/1 | 0/0/0/0/1 | 5  | 23   | dead  | 58.0  | 24.9 |



|    |    |           |            |   |      |       |       |      |
|----|----|-----------|------------|---|------|-------|-------|------|
| NA | NA | 0/0/0/0/1 | 0/0/0/0/1  | 1 | 61.8 | alive | 136.1 | 71.6 |
| NA | NA | 0/0/0/0/1 | 0/0/0/0/1  | 1 | 11.4 | dead  | 33.8  | 18.5 |
| NA | NA | 0/0/0/0/1 | 0/0/0/0/1  | 2 | 83.0 | alive | 104.7 | 17.1 |
| NA | NA | 0/0/0/0/1 | 0/0/0/0/1  | 1 | 35.8 | alive | 75.0  | 37.5 |
| m  | 64 | 0/0/0/0/1 | 1/0/0/0/0  | 1 | 64   | alive | 114.6 | 47.7 |
| m  | 65 | 0/0/0/0/1 | 0/1/0/0/0/ | 2 | 25.1 | alive | 91.7  | 46.9 |
| f  | 63 | 0/0/0/0/1 | 0/1/0/0/0  | 1 | 19.7 | alive | 77.6  | 36.2 |
| m  | 65 | 0/0/0/0/1 | 0/0/0/0/1  | 1 | 54.1 | alive | 85.9  | 31.1 |

Survival 1: survival after initial tumor resection

Survival 2: survival after resection of metastasis

NA: not available
